# Supplementary material for: Taurine as a powerful passivator of perovskite layer for efficient and stable perovskite solar cells
Source: Royal Society of Chemistry journal article supplement (doi:10.1039/d3ra02944a), 2023-01-01
Supplement: d3ra02944a1.pdf [file d3ra02944a1.pdf]

## **Taurine as a Powerful Passivator of Perovskite Layer for Efficient and Stable Perovskite Solar Cells**

Xian Hou<sup>1,a,b,\*</sup>, Zhenjia Yuan<sup>1,a</sup>, Jinlong Liu<sup>a</sup>, Hongzhen Ma<sup>a</sup>, Fucheng Yu<sup>a,b,\*</sup>

<sup>a</sup> Institute of Optoelectronic Materials and Devices, School of Materials Science and Engineering, Lanzhou University of Technology, Lanzhou, 730050, Gansu, China

<sup>b</sup> State Key Laboratory of Advanced Processing and Recycling of Non-ferrous Metals, Lanzhou University of Technology, Lanzhou 730050, Gansu, China

<sup>1</sup> These authors share the first authorship.

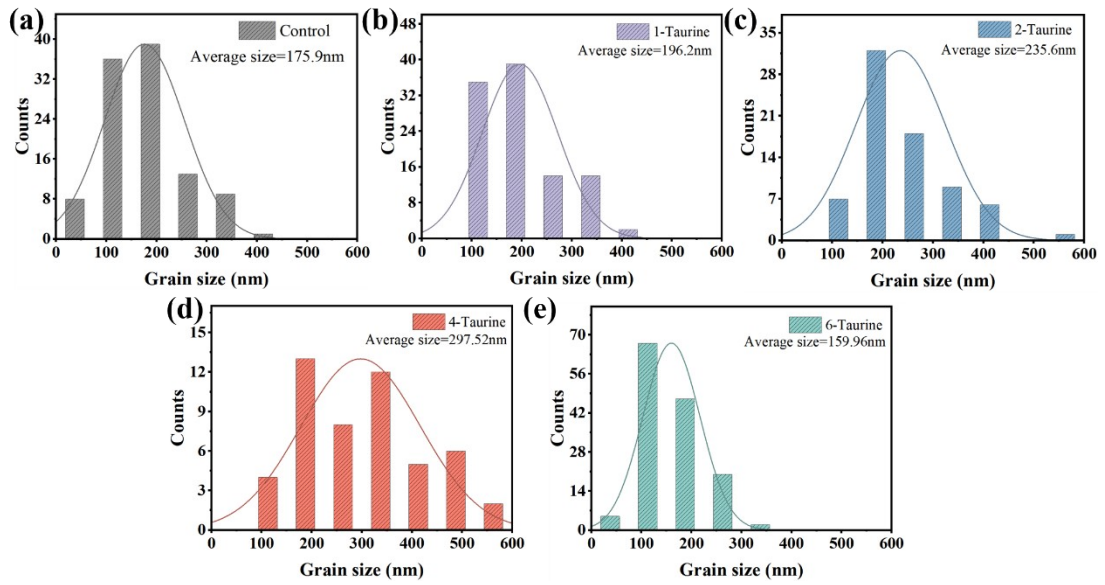

Fig. S1. Grain size distribution of the (a) control, (b) 1-Taurine, (c) 2-Taurine, (d) 4-Taurine and (e) 6-Taurine perovskite film.

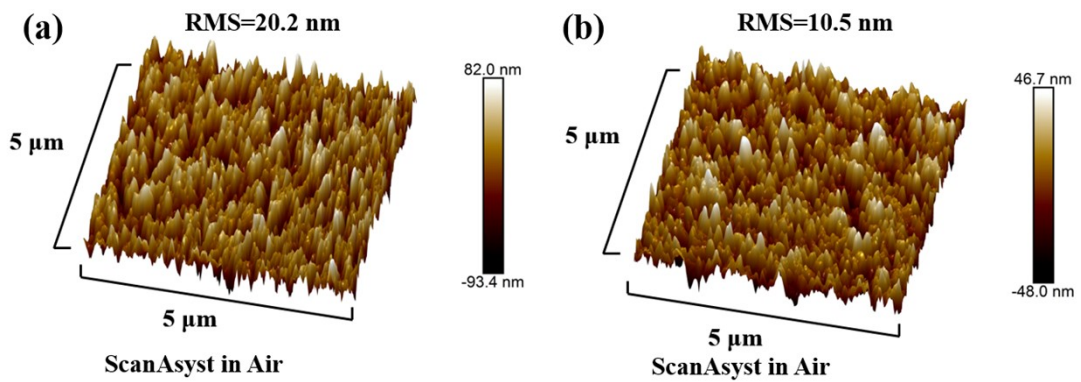

Fig. S2 SPM images of (a) control and (b) 4-Taurine perovskite films.

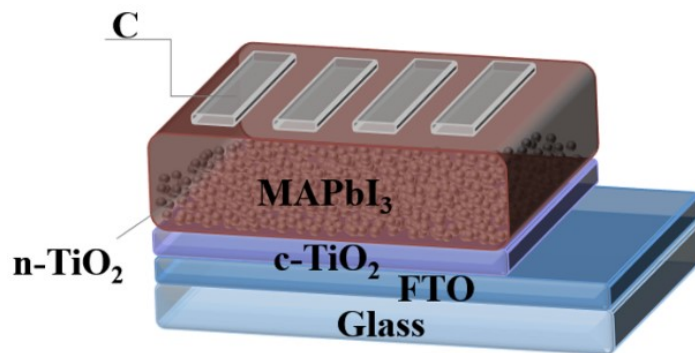

Fig. S3. Schematic diagram of FTO/n-TiO<sub>2</sub>/c-TiO<sub>2</sub>/MAPbI<sub>3</sub>/C PSCs device structure.

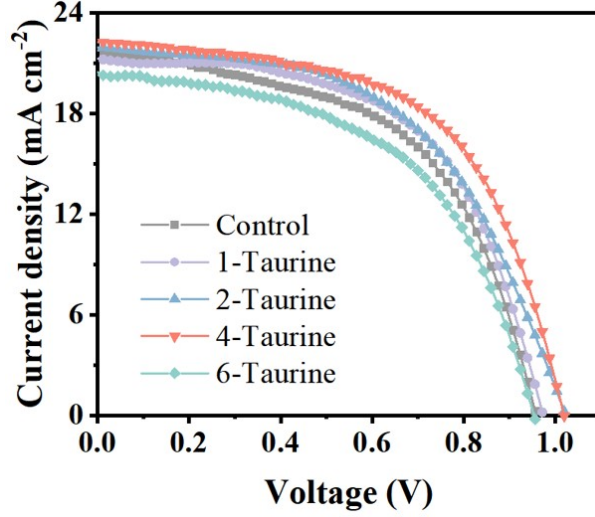

Fig. S4. The J-V curves of the PSCs devices with different concentrations of Taurine.

Table S1. The FWHM of (110) peak for perovskite films.

| Samples | Control | 1-Taurine | 2-Taurine | 4-Taurine | 6-Taurine |
|---------|---------|-----------|-----------|-----------|-----------|
| FWHM    | 0.171   | 0.170     | 0.146     | 0.136     | 0.274     |

| Samples           | Control | 1-Taurine | 2-Taurine | 4-Taurine | 6-Taurine |
|-------------------|---------|-----------|-----------|-----------|-----------|
| $\tau_{ave}$ (ns) | 12.42   | 16.39     | 21.34     | 29.26     | 25.26     |

Table S2. The calculated  $\tau_{ave}$  of perovskite films.

Table S3. The  $R_s$ ,  $R_{rec}$  and CPE of PSCs.

| Samples                     | $R_s$ ( $\Omega$ ) | $R_{rec}$ (k $\Omega$ ) | Capacitance of CPE (F) |
|-----------------------------|--------------------|-------------------------|------------------------|
| MAPbI <sub>3</sub>          | 46.20              | 8.38                    | $5.94 \times 10^{-9}$  |
| MAPbI <sub>3</sub> :Taurine | 9.37               | 16.87                   | $5.82 \times 10^{-9}$  |

Table S4. The statistical PV parameters of PSCs.

| Samples                     |         | PCE (%)    | $V_{OC}$ (V) | $J_{SC}$ (mA cm <sup>-2</sup> ) | FF (%)     |
|-----------------------------|---------|------------|--------------|---------------------------------|------------|
| MAPbI <sub>3</sub>          | Average | 9.22±1.18  | 0.94±0.05    | 20.75±1.12                      | 47.57±4.92 |
|                             | Best    | 11.26      | 0.96         | 21.80                           | 53.80      |
| MAPbI <sub>3</sub> :Taurine | Average | 11.26±1.30 | 0.98±0.04    | 21.12±1.31                      | 54.37±4.28 |
|                             | Best    | 13.19      | 1.02         | 22.30                           | 57.99      |
